# Supplementary material for: Modulation of the kinetics of outer-sphere electron transfer at graphene by a metal substrate
Source: Royal Society of Chemistry journal article supplement (doi:10.1039/d2cp03771h), 2022-01-01
Supplement: d2cp03771h1.pdf [file d2cp03771h1.pdf]

Supplementary information

## Modulation of the kinetics of outer-sphere electron transfer at graphene by a metal substrate

Sergey V. Pavlov,<sup>\*a</sup> Yekaterina O. Kozhevnikova,<sup>a</sup> Vitaliy A. Kislenko<sup>b,a</sup> and Sergey A. Kislenko<sup>\*a</sup>

<sup>a</sup>Joint Institute for High Temperatures of the Russian Academy of Sciences, Izhorskaya 13/2, Moscow, 125412, Russian Federation.

<sup>b</sup>Center for Energy Science and Technology, Skolkovo Institute of Science and Technology, Nobel Str. 3, Moscow, 143026, Russian Federation.

E-mail: [kislenko@ihed.ras.ru](mailto:kislenko@ihed.ras.ru), [sergey.v.pavlov@phystech.edu](mailto:sergey.v.pavlov@phystech.edu)

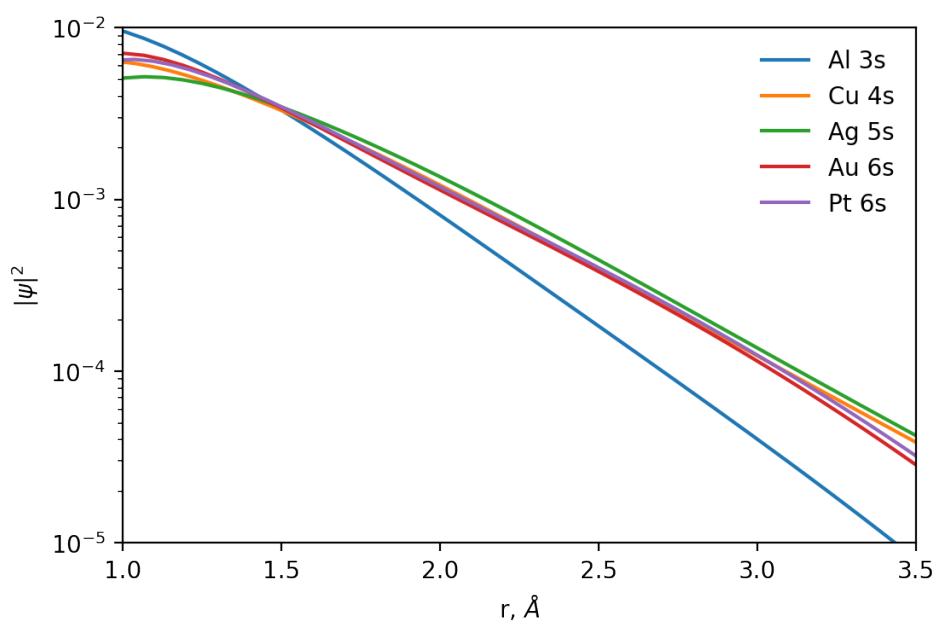

**Fig. 1S.** Squared single-atom wavefunctions of the Al 3s orbital, Cu 4s orbital, Ag 5s orbital, Au and Pt 6s orbitals obtained by DFT/B3LYP/LanL2DZ.
